# Supplementary material
Source: publisher site journal article supplement (https://www.spandidos-publications.com/8622/downloadSupplementary)

Figure S1. mRNA expression levels of STAT4 detected by reverse transcription-quantitative PCR. (A) STAT4 overexpression via Lipofectamine-mediated transfection. THP-1 cells transfected with the empty vector were used as the control. (B) STAT4 gene silencing using siRNA transfection. THP-1 cells transfected with negative control siRNA were used as the control. \* $P < 0.05$ . siRNA, small interfering RNA.

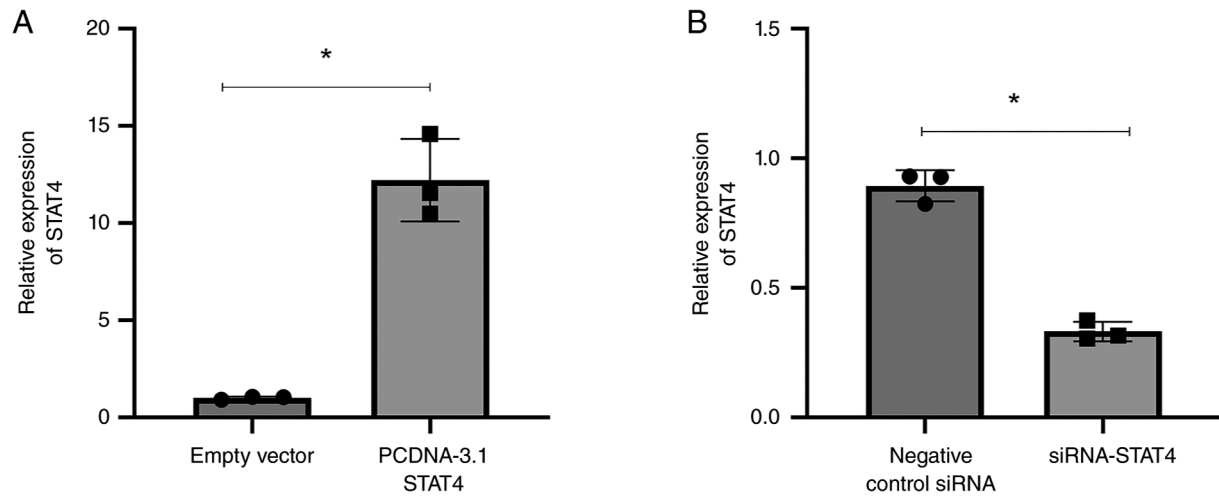

Supplement: Supplementary file 1 [file downloadSupplementary]
